# Supplementary material
Source: MDPI journal article supplement (https://www.mdpi.com/2072-4292/14/20/5173)
Supplement: s1 [file s1]

Supplement Material

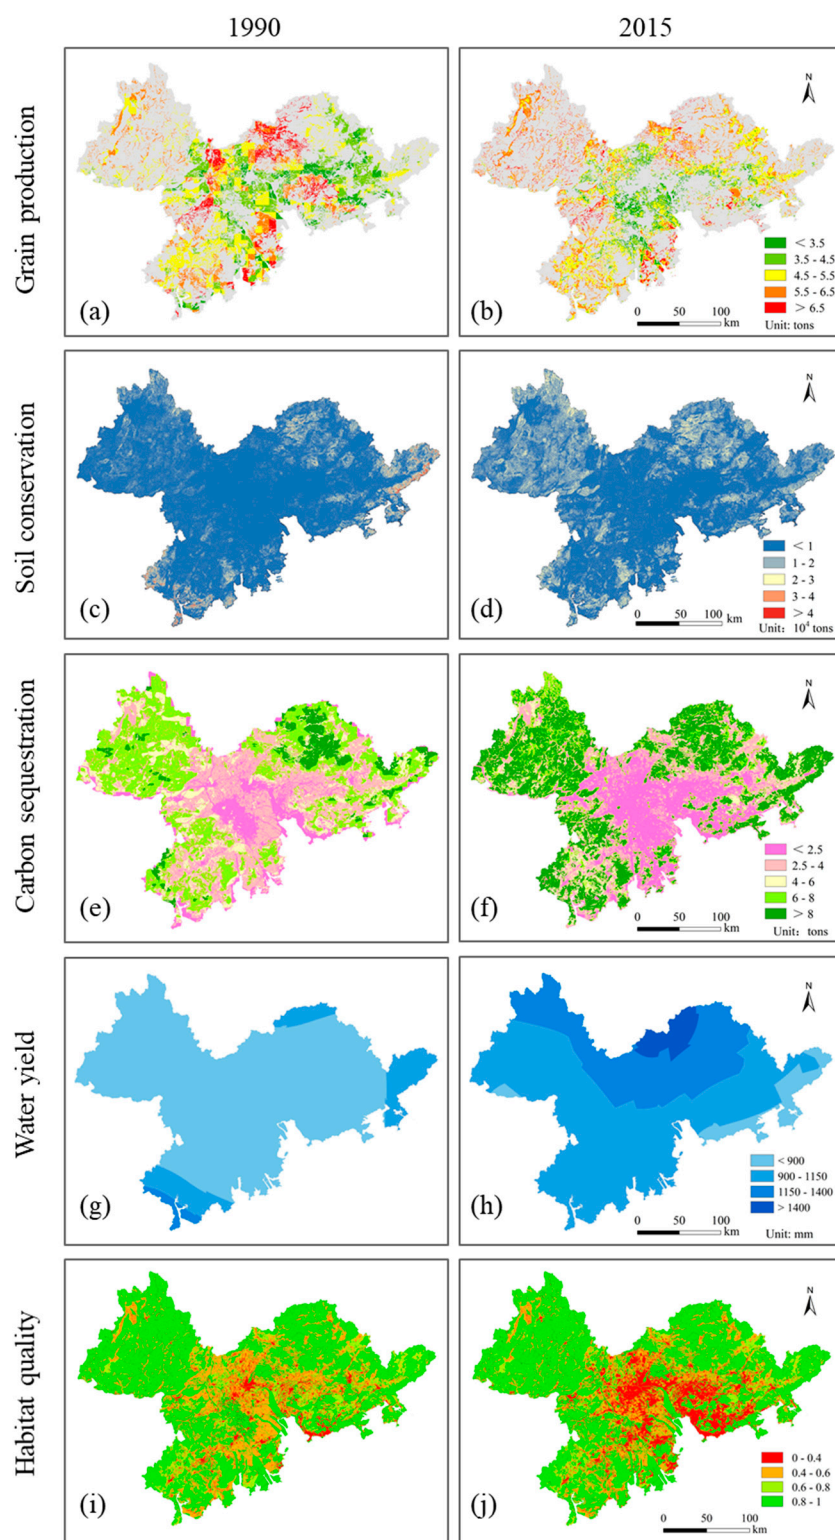

**Figure S1.** Spatial distribution of ecosystem services in 1990 and 2015 in the Pearl River Delta. Note: (a) Grain production in 1990, (b) Grain production in 2015, (c) Soil conservation in 1990, (d) Soil conservation in 2015, (e) Carbon sequestration in 1990, (f) Carbon sequestration in 2015, (g) Water yield in 1990, (h) Water yield in 2015, (i) Habitat quality in 1990, (j) Habitat quality in 2015.
